# Supplementary material for: ADD1 Single Nucleotide Polymorphisms Are Associated With Essential Hypertension Among Han and Mongolian Population in Inner Mongolia Area
Source: Front Genet. 2022 Aug 12;13:931803. doi: 10.3389/fgene.2022.931803 (PMC9412030; doi:10.3389/fgene.2022.931803)
Supplement: Supplementary file 4 [file DataSheet2.XLSX]

## Sheet: Sheet1
CYP11B2 gene in Han population
SNP ID	Genotype(%)			HWE-P	P	Alleles(%)		OR(95%CI)	P
rs3802230	AA	AC	CC			A	C
EH	27(13.7)	93(47.2)	77(39.1)	0.9		147(37.3)	247(62.7)
Control	30(14.4)	91(43.5)	88(42.1)	0.41	0.756	151(36.1)	267(63.9)	1.05(0.79,1.40)	0.726
rs6433	AA	AG	GG			A	G
EH	132(67.0)	62(31.5）	3(1.5)	0.69		326(82.7)	68(17.3)
Control	145(69.4)	58(27.8)	6(2.9)	0.95	0.515	348(83.3)	70(16.7)	0.96(0.67,1.39)	0.846
rs11781082	AA	AG	GG			A	G
EH	2(1.0)	36(18.3)	159(80.7)	0.98		40(10.2)	354(89.8)
Control	2(1.0)	41(19.6)	166(79.4)	0.76	0.925	45(10.8)	373(89.2)	0.94(0.60.1.47)	0.775
CYP11B2 gene in Mongolia population
SNP ID	Genotype(%)			HWE-P	P	Alleles(%)		OR(95%CI)	P
rs3802230	AA	AC	CC			A	C
EH	31(15.5)	93(46.5)	76(38.0)	0.77		155(38.8)	245(61.3)
Control	35(16.6)	94(44.5)	82(38.9)	0.36	0.913	164(38.9)	258(61.1)	1.00(0.75,1.32)	0.974
rs6433	AA	AG	GG			A	G
EH	145(72.5)	48(24.0)	7(3.5)	0.24		338(84.5)	62(15.5)
Control	148(70.1)	57(27.0)	6(2.8)	0.86	0.746	353(83.6)	69(16.4)	1.07(0.73,1.55)	0.739
rs11781082	AA	AG	GG			A	G
EH	2(1.0)	37(18.5)	161(80.5)	0.94		41(10.3)	359(89.8)
Control	2(0.9)	41(19.4)	168(79.6)	0.77	0.962	45(10.7)	377(89.3)	0.96(0.61,1.50)	0.846
ADD1 gene in Han population
SNP ID	Genotype(%)			HWE-P	P	Alleles(%)		OR(95%CI)	P
rs12503220	AA	AG	GG			A	G
EH	4(2.1)	42(21.6)	148(76.3)	0.62		50(12.9)	338(87.1)
Control	8(3.9)	53(25.6)	146(70.5)	0.26	0.333	69(16.7)	345(83.3)	0.74(0.50,1.10)	0.132
rs57526673	CC	CT	TT			C	T
EH	125(64.4)	61(31.4)	8(4.1)	0.87		311(80.2)	77(19.8)
Control	138(66.7)	57(27.5)	12(5.8)	0.07	0.56	333(80.4)	81(19.6)	0.98(0.69,1.39)	0.921
rs2239728	AA	AC	CC			A	C
EH	37(19.1)	88(45.4)	69(35.6)	0.35		162(41.8)	226(58.2)
Control	48(23.2)	108(52.2)	51(24.6)	0.53	0.056	204(49.3)	210(50.7)	0.74(0.56,0.98)	0.033*
rs4961	TT	GT	GG			T	G
EH	69(35.6)	88(45.4)	37(19.1)	0.35		226(58.2)	162(41.8)
Control	51(24.6)	107(51.7)	49(23.7)	0.63	0.055	209(50.5)	205(49.5)	1.37(1.04,1.81)	0.027*
ADD1 gene in Mongolia population
SNP ID	Genotype(%)			HWE-P	P	Alleles(%)		OR(95%CI)	P
rs12503220	AA	AG	GG			A	G
EH	3(1.5)	49(24.3)	150(74.3)	0.66		55(13.6)	349(86.4)
Control	2(1.0)	36(17.5)	168(81.6)	0.96	0.186	40(9.7)	372(90.3)	1.47(0.95,2.26)	0.082
rs57526673	CC	CT	TT			C	T
EH	144(71.3)	49(24.3)	9(4.5)	0.08		337(83.4)	67(16.6)
Control	146(70.9)	55(26.7)	5(2.4)	0.9	0.481	347(84.2)	65(15.8)	0.94(0.65,1.37)	0.754
rs2239728	AA	AC	CC			A	C
EH	44(21.8)	95(47.0)	63(31.2)	0.47		183(45.3)	221(54.7)
Control	30(14.6)	105(51.0)	71(34.5)	0.38	0.166	165(40.0)	247(60.0)	1.24(0.94,1.64)	0.13
rs4961	TT	GT	GG			T	G
EH	63(31.2)	95(47.0)	44(21.8)	0.47		221(54.7)	183(45.3)
Control	71(34.5)	105(51.0)	30(14.6)	0.38	0.166	247(60.0)	165(40.0)	0.81(0.61,1.07)	0.13
